# Supplementary material for: The Influence of Birthweight on Adult Lung Function: Insights from the UK Biobank
Source: Research Square preprint supplement (doi:10.21203/rs.3.rs-4168941/v1), 2024-04-11
Supplement: Supplementary file 1 [file f5dd907470cf02a15359423b.docx]

Supplementary material

The Influence of Birthweight on Adult Lung Function: Insights from the UK Biobank

Yu Wang et, al.

Table S1 Comparison of baseline characteristics for those included and excluded from the final analyses.

| Variables | Participates included in present analysis (n=201,615) | Participates excluded from present analysis (n=300,756) | Cramer's w | Cohen’s d |
| --- | --- | --- | --- | --- |
| Gender |  |  | 0.096 |  |
| Female | 121,503 (60.2) | 151,699 (50.4) |  |  |
| Male | 80,112 (39.8)) | 148,957 (49.5) |  |  |
| Age, year | 55.6 ± 8.00 | 58.0 ± 8.0 |  | 0.29 |
| Lung function tests |  |  |  |  |
| FEV1, L | 2.86 ± 0.78 | 2.84 ± 0.79 |  | 0.011 |
| FVC, L | 3.77 ± 0.98 | 3.79 ± 0.99 |  | 0.030 |
| Birthwight, Kg | 3.33 ± 0.66 | 3.29 ± 0.69 |  | 0.056 |
| BMI | 27.3 ± 4.77 | 27.5 ± 4.82 |  | 0.048 |
| Height, cm | 168.4 ± 9.23 | 168.4 ± 9.31 |  | 0.004 |
| Weight, Kg | 77.7 ± 16.0 | 78.3 ± 15.9 |  | 0.041 |
| Smoking status |  |  | 0.041 |  |
| Never | 112,282 (55.7) | 161,168 (53.6) |  |  |
| Previous | 69,090 (34.3) | 103,920 (34.6) |  |  |
| Current | 19,694 (9.77) | 33,267 (11.1) |  |  |
| Drinking status |  |  | 0.073 |  |
| Never | 5,842 (2.90) | 16,534 (5.50) |  |  |
| Previous | 6,264 (3.11) | 11,829 (3.93) |  |  |
| Current | 189,366 (93.9) | 270,879 (90.1) |  |  |
| Household income |  |  | 0.11 |  |
| <GBP 31 ,000 | 74203 (36.8) | 131,116 (43.6) |  |  |
| ≥GBP 31 ,000 | 103,771 (51.5) | 116,142 (38.6) |  |  |
| Education |  |  | 0.024 |  |
| A-level, O-level or CSEs | 82,884 (41.1) | 104,472 (34.7) |  |  |
| College, university, NVQ or  other professional qualifications | 91,853 (45.6) | 127,773 (42.5) |  |  |
| Townsend deprivation index | -1.59 ± 2.90 | 1.10 ± 3.20 |  | 0.16 |
| Birth place |  |  | 0.078 |  |
| England | 165,133 (81.9) | 225,263 (74.9) |  |  |
| Elsewhere | 36,451 (18.1) | 73,740 (24.5) |  |  |

FEV1, forced expiratory volume in 1 second; FVC, forced vital capacity; BMI, body mass index; GBP, Great Britain Pound.


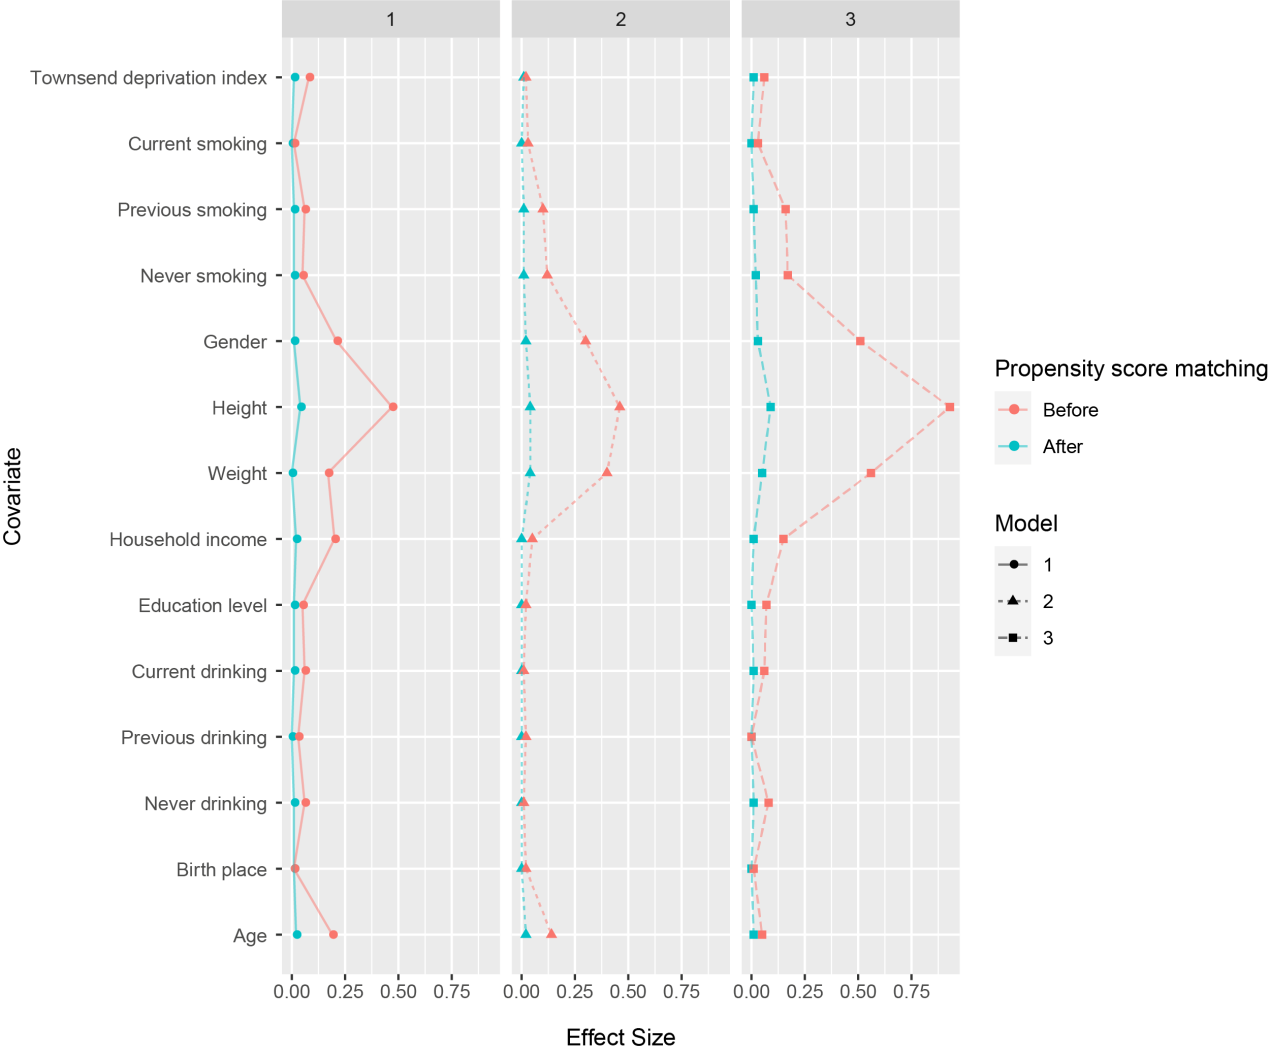


Fig. S1 Covariate balance plot showing the standardized mean differences of the variables involved in the matching process.


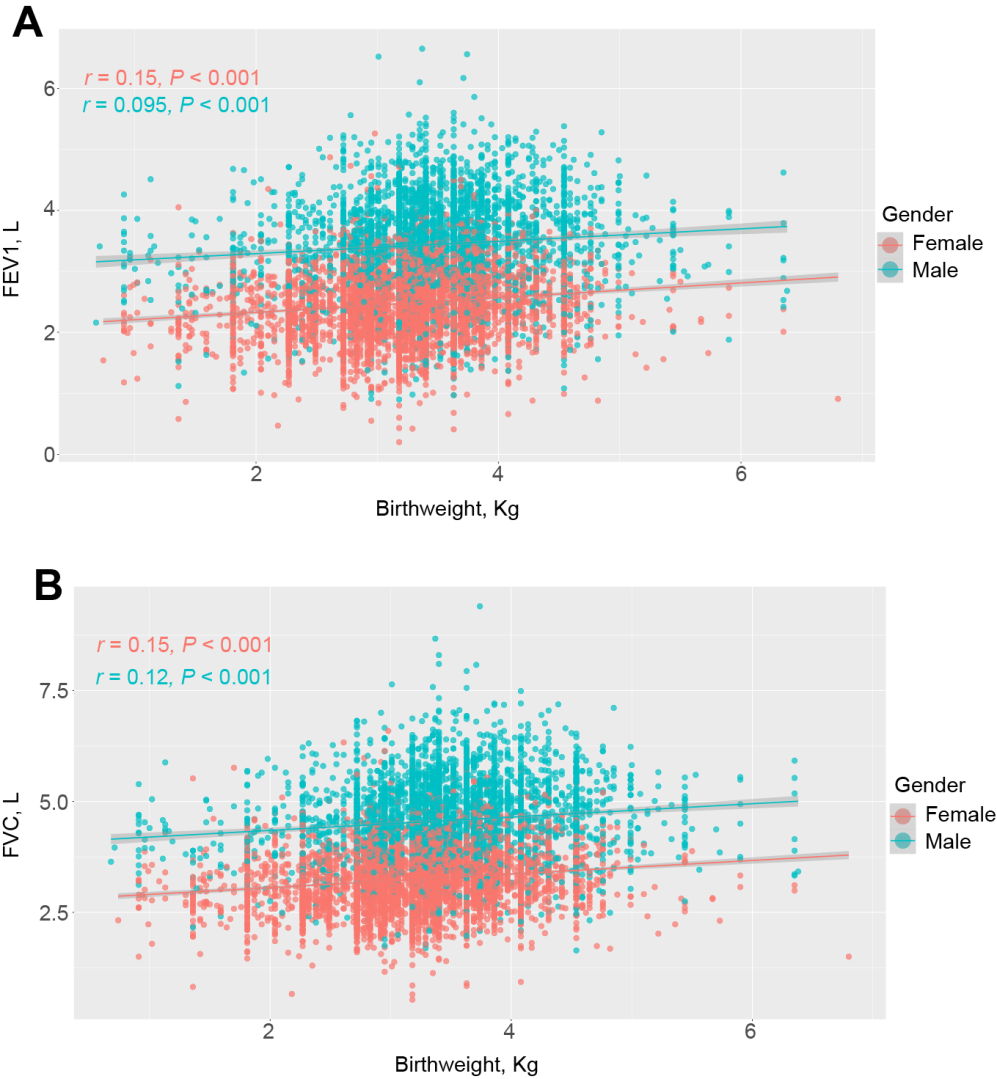


Fig. S2 Correlation in birthweight with FEV1 and FVC
